# Supplementary material for: Influence of Single Dose Enrofloxacin Injection on Development of Fluoroquinolone Resistance in Campylobacter jejuni in Calves
Source: Antibiotics (Basel). 2022 Oct 13;11(10):1407. doi: 10.3390/antibiotics11101407 (PMC9598087; doi:10.3390/antibiotics11101407)
Supplement: Supplementary file 1 [file antibiotics-11-01407-s001.zip › antibiotics-1943849-supplementary.pdf]

**Table S1.** Bacterial isolates used for inoculation of calves with *Campylobacter jejuni* (oral) and *Mannheimia haemolytica* (trans-tracheal) in the current study.

| Isolate/strain                | Source                  | Origin   | Isolation date | Reference |
|-------------------------------|-------------------------|----------|----------------|-----------|
| <i>C. jejuni</i> IA-6-FC-30   | Feces of healthy cattle | Iowa     | 2013           | [61]      |
| <i>C. jejuni</i> MO-2-FC-25   | Feces of healthy cattle | Missouri | 2013           | [61]      |
| <i>M. haemolytica</i> VDL4004 | Pneumonic lung of calf  | Iowa     | 2018           | [44]      |
